# Supplementary material for: Degradation of polycarbonate to produce bisphenol A catalyzed by imidazolium-based DESs under metal-and solvent-free conditions
Source: Royal Society of Chemistry journal article supplement (doi:10.1039/d0ra09215k), 2021-01-01
Supplement: d0ra09215k1.pdf [file d0ra09215k1.pdf]

## Supplementary Information

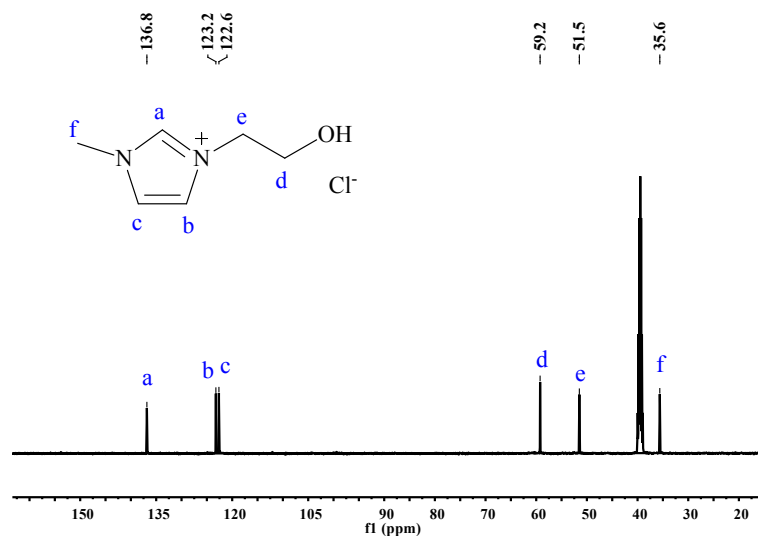

Fig. S1 <sup>13</sup>C NMR spectrum of [EmimOH]Cl

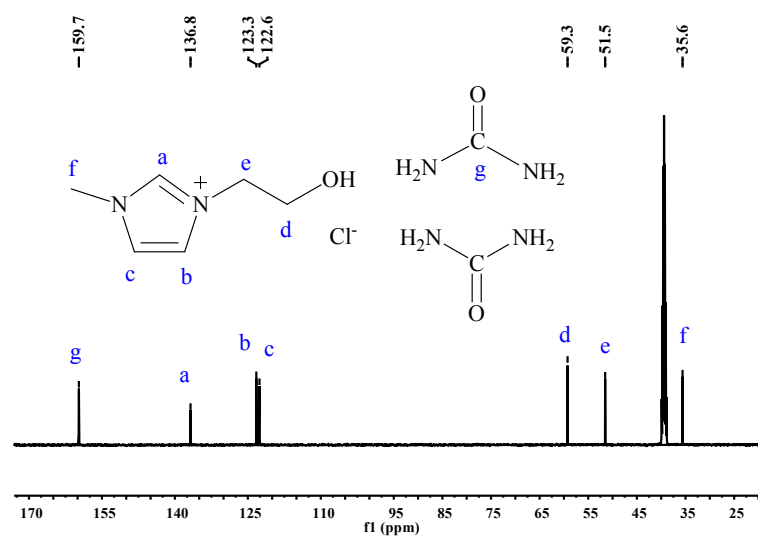

Fig. S2 <sup>13</sup>C NMR spectrum of [EmimOH]Cl-2Urea

**Table S1 Different catalytic systems reported in the literatures**

| Entry | Catalyst                                    | Solvent | T/ °C | t/h  | m <sub>cat</sub> :m <sub>PC</sub> | n <sub>PC</sub> :n <sub>CH<sub>3</sub>OH</sub> | C <sub>PC</sub> /% | Y <sub>BPA</sub> /% |
|-------|---------------------------------------------|---------|-------|------|-----------------------------------|------------------------------------------------|--------------------|---------------------|
| 1     | NaOH <sup>14</sup>                          | Toluene | 60    | 1.17 | 0.026:1                           | 1:2                                            | 100                | 96                  |
| 2     | ZnO-NPs/NBu <sub>4</sub> Cl <sup>18</sup>   | THF     | 100   | 7    | 0.33:1                            | 1:28                                           | 100                | 98                  |
| 3     | CaO/Ce-SBA-15 <sup>20</sup>                 | THF     | 130   | 3    | 0.3:1                             | 1:8                                            | 100                | 94                  |
| 4     | [Bmim][Cl] <sup>21</sup>                    | —       | 105   | 2.5  | 1:1                               | 1:1.5                                          | 100                | 95                  |
| 5     | [Bmim][Ac] <sup>22</sup>                    | —       | 90    | 2.5  | 0.75:1                            | 1:6                                            | 100                | 95                  |
| 6     | [Bmim]Cl·2.0FeCl <sub>3</sub> <sup>23</sup> | —       | 120   | 3    | 0.1:1                             | 1:6                                            | 100                | 97                  |
| 7     | [HDBU][LAc] <sup>24</sup>                   | —       | 120   | 1    | 0.05:1                            | 1:5                                            | 100                | 98                  |
| 8     | [HDBU][Im] <sup>25</sup>                    | —       | 70    | 2    | 0.1:1                             | 1:5                                            | 100                | 96                  |
| 9     | ChCl-2Urea <sup>43</sup>                    | —       | 130   | 2.5  | 0.1:1                             | 1:5                                            | 100                | 99                  |
| 10    | [EmimOH]Cl-2Urea <sup>a</sup>               | —       | 120   | 2    | 0.1:1                             | 1:5                                            | 100                | 99                  |

<sup>a</sup> this work; <sup>b</sup>conversion of PC; <sup>c</sup> yield of BPA

Oku et al.<sup>14</sup> used NaOH as a catalyst and toluene as a solvent for the methanolysis of PC with 96% Y<sub>BPA</sub>. Solid bases ZnO-nPs/NBu<sub>4</sub>Cl<sup>18</sup> and CaO/Ce-SBA-15<sup>20</sup> were also used to catalyze this reaction, not only THF was used as the solvent, but also a large amount of methanol (n(methol)/n(PC)=28, 8) and catalyst (m(cat)/m(PC)=0.33, 0.3). The reaction time was long (7 h, 3 h) and the reaction temperature was also a little high (130 °C). Ionic liquids (ILs) such as [Bmim][Cl],<sup>21</sup> [Bmim][Ac],<sup>22</sup> [Bmim]Cl·2.0FeCl<sub>3</sub>,<sup>23</sup> [HDBU][LAc]<sup>24</sup> and [HDBU][Im]<sup>25</sup> can significantly reduce the methanolysis temperature and shorten the reaction time, but the synthesis process of ILs is cumbersome, costly, metal ions contaminate the product<sup>23</sup> and cannot be biodegraded. In our previous work, deep eutectic solvent (DES) ChCl-2Urea<sup>43</sup> was successfully used to catalyze the PC methanolysis, with 100% C<sub>PC</sub> and 99% Y<sub>BPA</sub> at 130 °C for 2.5 h. Compared with ChCl-2Urea, [EmimOH]Cl-2Urea not only decreased the reaction temperature but also shortened reaction times in this work.
